# Supplementary material for: Threshold reduction and yield improvement of semiconductor nanowire lasers via processing-related end-facet optimization
Source: Nanoscale Adv. 2019 Oct 2;1(11):4393–7. doi: 10.1039/c9na00479c (PMC9417496; doi:10.1039/c9na00479c)
Supplement: NA-001-C9NA00479C-s001 [file NA-001-C9NA00479C-s001.pdf]

**Supporting information for:**

**Threshold reduction and yield improvement of**

**semiconductor nanowire lasers via**

**processing-related end-facet optimization**

Juan Arturo Alanis,<sup>†</sup> Qian Chen,<sup>‡</sup> Mykhaylo Lysevych,<sup>¶,§</sup> Tim Burgess,<sup>§</sup> Li Li,<sup>¶,§</sup>  
Zhu Liu,<sup>‡</sup> Hark Hoe Tan,<sup>§</sup> Chennupati Jagadish,<sup>§</sup> and Patrick Parkinson<sup>\*,†</sup>

*<sup>†</sup>Department of Physics and Astronomy and the Photon Science Institute, The University  
of Manchester, Manchester, UK*

*<sup>‡</sup>Department of Materials, The University of Manchester, Manchester, UK*

*<sup>¶</sup>Australian National Fabrication Facility, The Australian National University, Canberra,  
Australia*

*<sup>§</sup>Department of Electronic Materials Engineering, Research School of Physics and  
Engineering, The Australian National University, Canberra, Australia*

E-mail: [patrick.parkinson@manchester.ac.uk](mailto:patrick.parkinson@manchester.ac.uk)

# Scanning Electron Microscopy

## Fracture point imaging

Figure S1 shows Scanning Electron Microscope (SEM) images of growth substrates before and after each transfer process respectively. The top row shows nanowires on their original growth substrate prior to being transferred onto quartz. Note that both true nanowires (with a superlattice structure) and pseudo-nanowires (with no gold seed) can be observed on the substrate. All subsequent rows include images from growth substrates showing nanowire fracture point associated to each transfer method (as labelled). Panels on the left show high resolution images associated to each label.

## Pseudo-nanowire structures on SEM-PDMS

The lower lasing yield of 60% from sample NW-PDMS is attributed to the presence of pseudo-nanowire objects which could derive from the nature of PDMS stamping for this nanowire architecture. These objects were observed to be present on nanowires transferred by PDMS when performing SEM for length calculations; a few examples are shown in Figure S2. The geometry of these structures is clearly not optimized for lasing; moreover, the lack of a clear gold colloid at the tip indicates that these are seed-free catalyzed wires; possibly catalyzed by defects during the growth. It is not clear why these wires are not transferred by other techniques, however, their short length and thick base are likely to make them more mechanically stable than the true nanowires.

## Length calculation from Scanning Electron Microscopy

An additional length study was performed by SEM to compare with the large scale optical study outlined in the main text. For the SEM study 4 samples were prepared by transferring nanowires onto a Si substrate using the transfer methods detailed in the main text and labeled SEM-PDMS, SEM-R, SEM-US5 and SEM-US100. Figure S3 shows a few sample

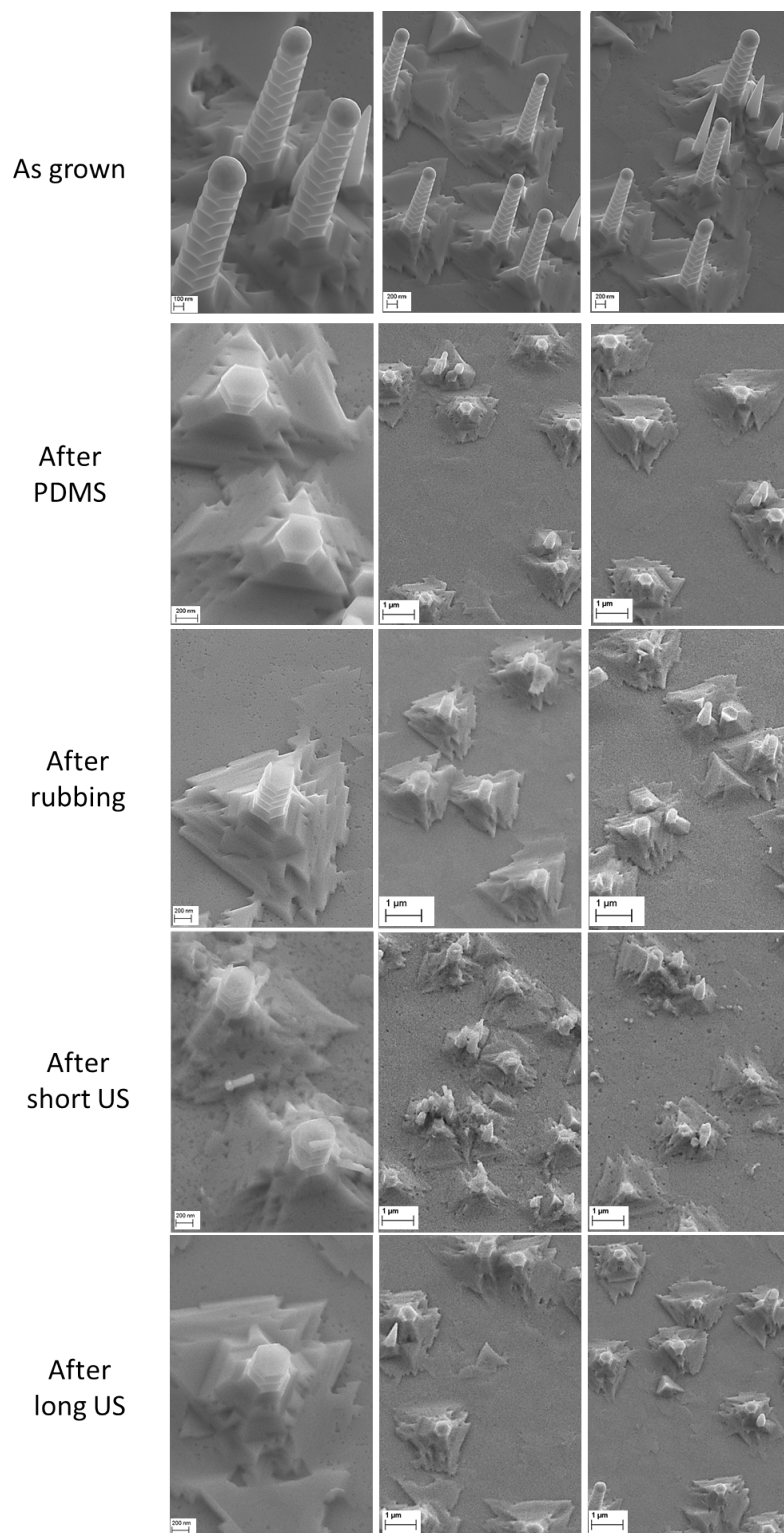

Figure S1: SEM imagery of free standing nanowires on their original growth substrate (Top row), and fracture point after nanowire transfer corresponding to each transfer method (left, top to bottom). (Center and Right columns) lower magnification images corresponding to each row.

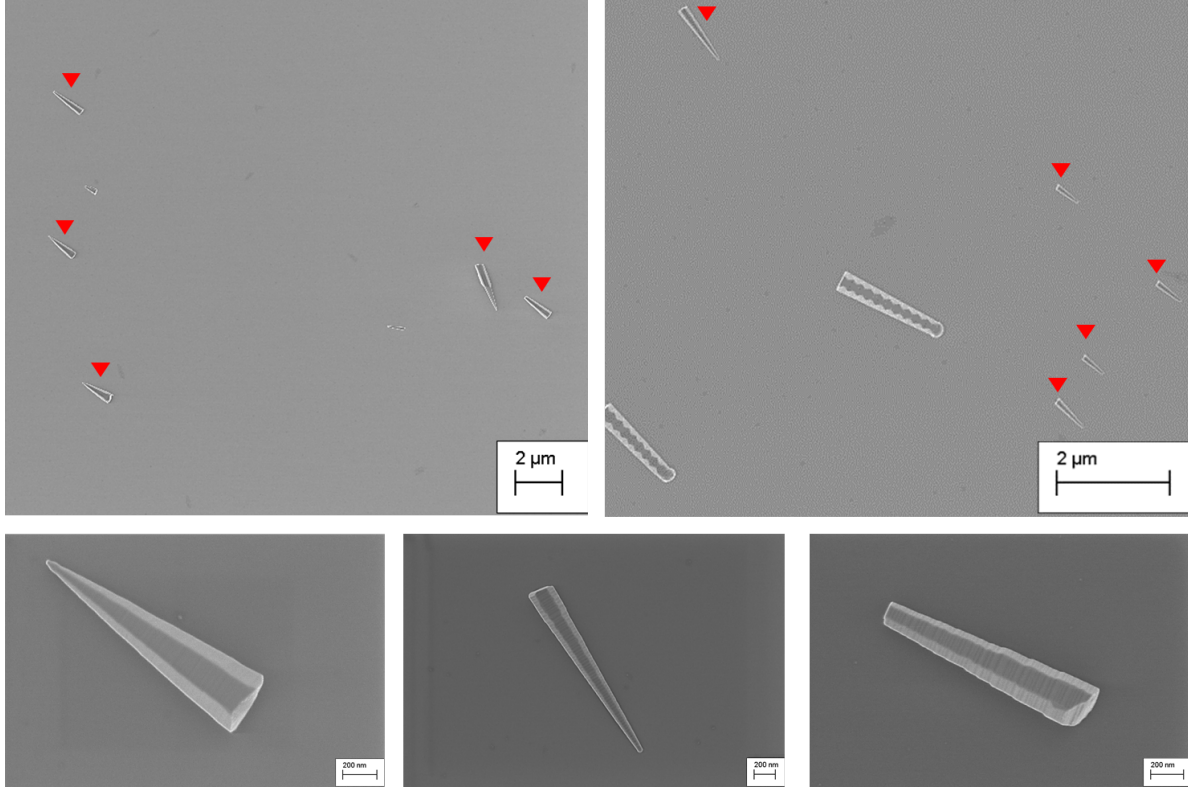

Figure S2: SEM imagery of a few non-wire structures found on sample SEM-PDMS. The two top insets show images at low magnification, where such nanostructures are flagged with red triangles. The three bottom insets show magnified images from three randomly selected nanostructures. We attribute the lower lasing yield of 60 % from sample NW-PDMS to the presence of these pseudo-nanowire objects.

images from nanowires randomly selected corresponding to each sample. A summary of lengths and mean values is shown in Table S1.

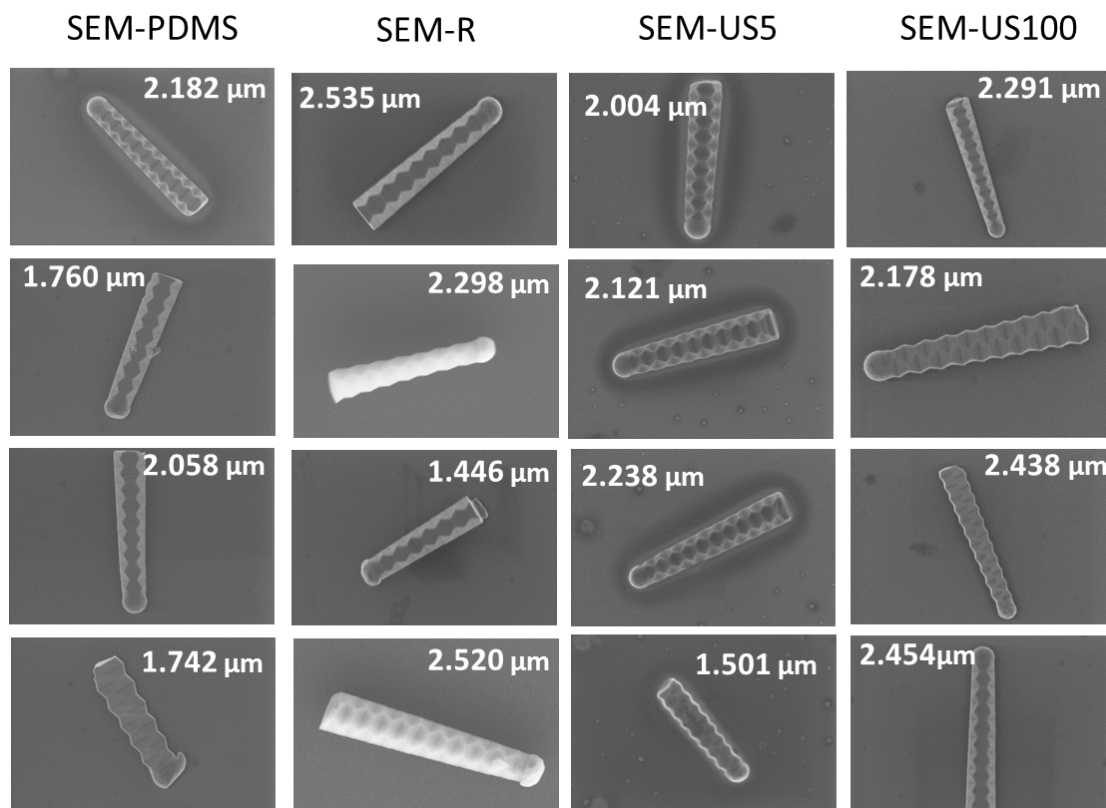

Figure S3: SEM imagery of a few selected nanowires taken from each sample. The measured length corresponding to each wire is displayed.

## ANOVA

### Calculations

For the ANOVA study we considered four independent groups corresponding to each transfer method: NW-R, NW-PDMS, NW-US5 and NW-US100. We wish to test whether there is a statistically significant difference in mean length and mean lasing threshold among the four groups. The hypotheses to be tested in this study are

Table S1: SEM length summary.

|             | <b>SEM-PDMS</b>  | <b>SEM-R</b>     | <b>SEM-US5</b>   | <b>SEM-US100</b> |
|-------------|------------------|------------------|------------------|------------------|
|             | 2.154            | 1.958            | 1.501            | 2.407            |
|             | 2.027            | 2.298            | 2.321            | 2.454            |
|             | 2.034            | 2.520            | 2.238            | 2.438            |
|             | 1.808            | 2.218            | 2.121            | 2.178            |
|             | 1.742            | 2.224            | 2.004            | 2.291            |
|             | 1.344            | 1.931            | 2.297            | 2.327            |
|             | 2.058            | 1.446            |                  |                  |
|             | 1.760            | 2.535            |                  |                  |
|             | 2.128            |                  |                  |                  |
|             | 2.182            |                  |                  |                  |
|             | 2.341            |                  |                  |                  |
|             | 2.173            |                  |                  |                  |
| <b>Mean</b> | <b>1.97±0.17</b> | <b>2.14±0.21</b> | <b>2.08±0.24</b> | <b>2.34±0.24</b> |

$$H_0 : \mu_{PDMS} = \mu_R = \mu_{US5} = \mu_{US100} \quad (1)$$

and

$$H_1 : \text{At least one mean is different.} \quad (2)$$

The test statistic  $F$  for testing  $H_0: \mu_1=\mu_2=\dots=\mu_k$  is given by the ratio

$$F = \frac{\text{MSB}}{\text{MSW}} \quad (3)$$

where MSB is the mean squares between groups obtained from the sum of squares (SSB) and degrees of freedom (DoF<sub>1</sub>) such that

$$\text{MSB} = \frac{\text{SSB}}{\text{DoF}_1} = \frac{\sum_{j=1}^k n_j (\mu_j - \mu_{tot})^2}{k - 1} \quad (4)$$

where  $n_j$  is the sample size in the  $j^{th}$  group,  $\mu_j$  is the sample mean,  $\mu_{tot}$  is the total mean and  $k$  is the number of independent groups. MSW is the mean squares within groups obtained from its sum of squares (SSW) and degrees of freedom (DoF<sub>2</sub>) written as

$$MSW = \frac{SSW}{DoF_2} = \frac{\sum_{j=1}^k \sum_{i=1}^k (X - \mu_j)^2}{N - k} \quad (5)$$

where  $X$  is an individual observation and  $N$  is the total number of observations in the study. The critical value to reject  $H_0$  is found in a table of probability values for the  $F$  distribution which is found in literature.

## Mean length ANOVA results

An ANOVA was used to compare mean length measured by optical imaging. The sample means corresponding to each transfer method are denoted  $\mu_{PDMS}$ ,  $\mu_R$ ,  $\mu_{US5}$  and  $\mu_{US100}$  as shown in the main manuscript. Nanowire mean length from samples measured by SEM were also included in the same study (denoted SEM- $\mu_{PDMS}$ , SEM- $\mu_R$ , SEM- $\mu_{US5}$  and SEM- $\mu_{US100}$  in the main manuscript). Table S2 summarizes ANOVA results where  $H_0$  is rejected at a significance level  $p \ll 0.01$ .

Table S2: Mean length ANOVA results

| Source of Variance | SS      | DoF  | MS      | $F$   | $p$                    |
|--------------------|---------|------|---------|-------|------------------------|
| Between groups     | 105.412 | 7    | 15.0589 | 44.33 | $6.61 \times 10^{-56}$ |
| Within groups      | 404.878 | 1192 | 0.3397  |       |                        |
| Total              | 510.29  | 1199 |         |       |                        |

## Mean threshold ANOVA results

An ANOVA test was used to verify if the difference in mean threshold was statistically significant across all transfer methods. The sample means were denoted  $\mu_{PDMS}$ ,  $\mu_R$ ,  $\mu_{US5}$  and  $\mu_{US100}$  as shown in the main manuscript. Table S3 shows the summary for ANOVA calculations where  $H_0$  was rejected at significance  $p \ll 0.01$ .

Table S3: Mean threshold ANOVA results

| <b>Source of Variance</b> | <b>SS</b> | <b>DoF</b> | <b>MS</b> | <b>F</b> | <b>p&gt;F</b>          |
|---------------------------|-----------|------------|-----------|----------|------------------------|
| Between groups            | 530526.1  | 3          | 176842    | 48.34    | $4.62 \times 10^{-29}$ |
| Within groups             | 3450015.6 | 943        | 3658.6    |          |                        |
| Total                     | 3980541.7 | 946        |           |          |                        |
